# Supplementary material for: Peptide probes with high affinity to target protein selection by phage display and characterization using biophysical approaches
Source: Royal Society of Chemistry journal article supplement (doi:10.1039/d2nj00621a), 2022-01-01
Supplement: d2nj00621a1.pdf [file d2nj00621a1.pdf]

## **Peptide probes with high affinity to target protein selection by phage display and characterization using biophysical approaches**

### **Contents**

**Table S1:** Peptide sequences

**Figure S1:** General strategy for the solid-phase synthesis of DHFR-Y1.

**Figure S2:** Derivatization strategies.

**Figure S3:** HPLC spectrum of DHFR-Y1.

**Figure S4:** 1D  $^1\text{H}$  NMR spectrum of DHFR-Y1 in DMSO- $d_6$ .

**Figure S5:** 1D  $^{13}\text{C}$  NMR spectrum of DHFR-Y1 in DMSO- $d_6$ .

**Figure S6:** 1D DEPT 135 spectrum of DHFR-Y1 in DMSO- $d_6$ .

**Figure S7:** Mass spectrum of DHFR-Y1.

**Figure S8:** HPLC spectrum of DHFR-Y $_n$ .

**Figure S9:** 1D  $^1\text{H}$  NMR spectrum of DHFR-Y $_n$  in DMSO- $d_6$ .

**Figure S10:** 1D  $^{13}\text{C}$  NMR spectrum of DHFR-Y $_n$  in DMSO- $d_6$ .

**Figure S11:** 1D DEPT 135 spectrum of DHFR-Y $_n$  in DMSO- $d_6$ .

**Figure S12:** Mass spectrum of DHFR-Y $_n$ .

**Figure S13:** HPLC spectrum of DHFR-Y $_c$ .

**Figure S14:** Mass spectrum of DHFR-Y $_c$ .

**Figure S15:** The Differential Scanning Fluorimetry assay for DHFR-Y1.

Table S1: Analogue peptide sequences.

| Peptide | Sequence                                              |
|---------|-------------------------------------------------------|
| DHFR-Y1 | NH <sub>2</sub> -Trp-Ser-Leu-Gly-Tyr-Thr-Gly-Ac       |
| DHFR-Yn | Flu-βA-Trp-Ser-Leu-Gly-Tyr-Thr-Gly-Ac                 |
| DHFR-Yc | NH <sub>2</sub> -Trp-Ser-Leu-Gly-Tyr-Thr-Lys (Flu)-Ac |

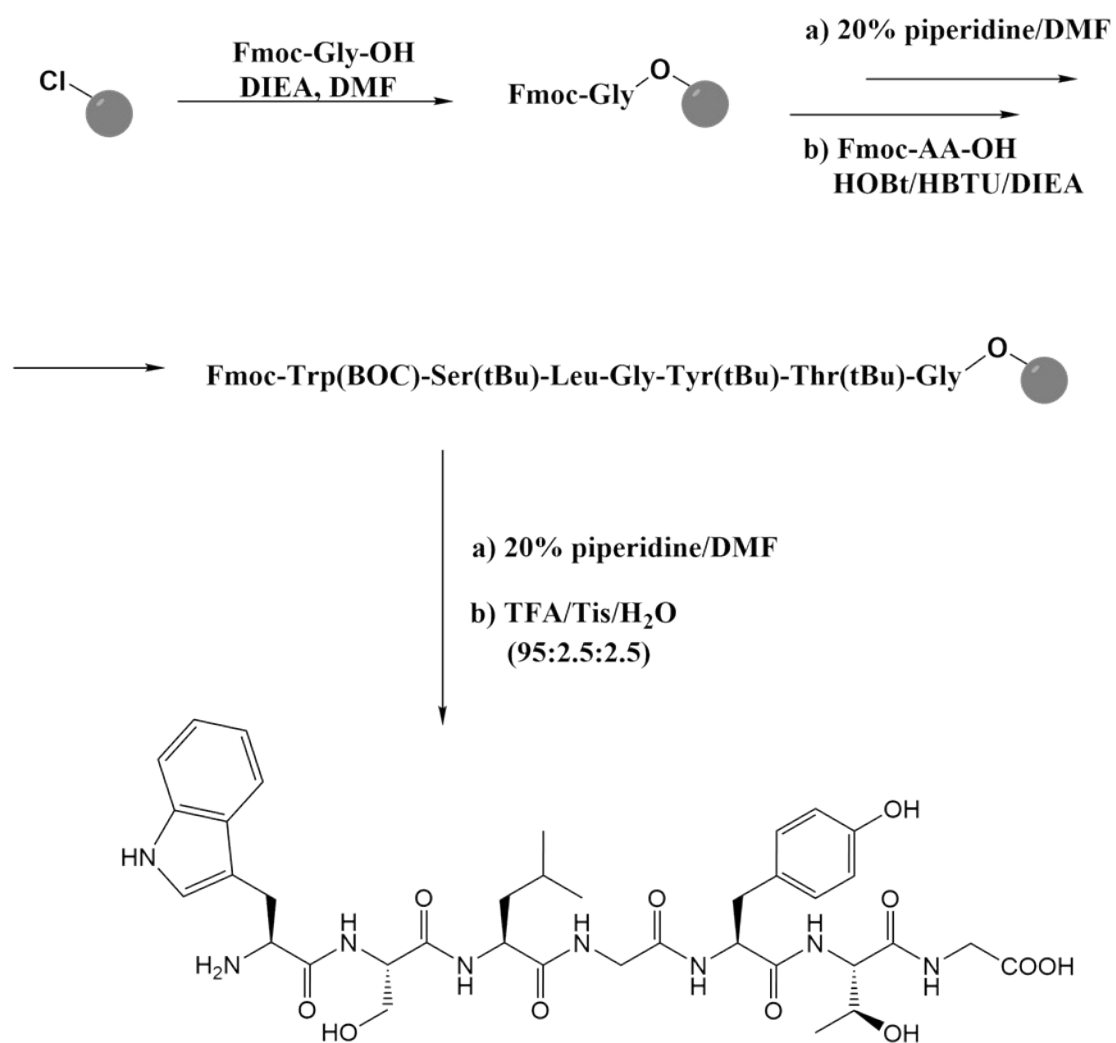

**Figure S1:** General strategy for the solid-phase synthesis of DHFR-Y1.

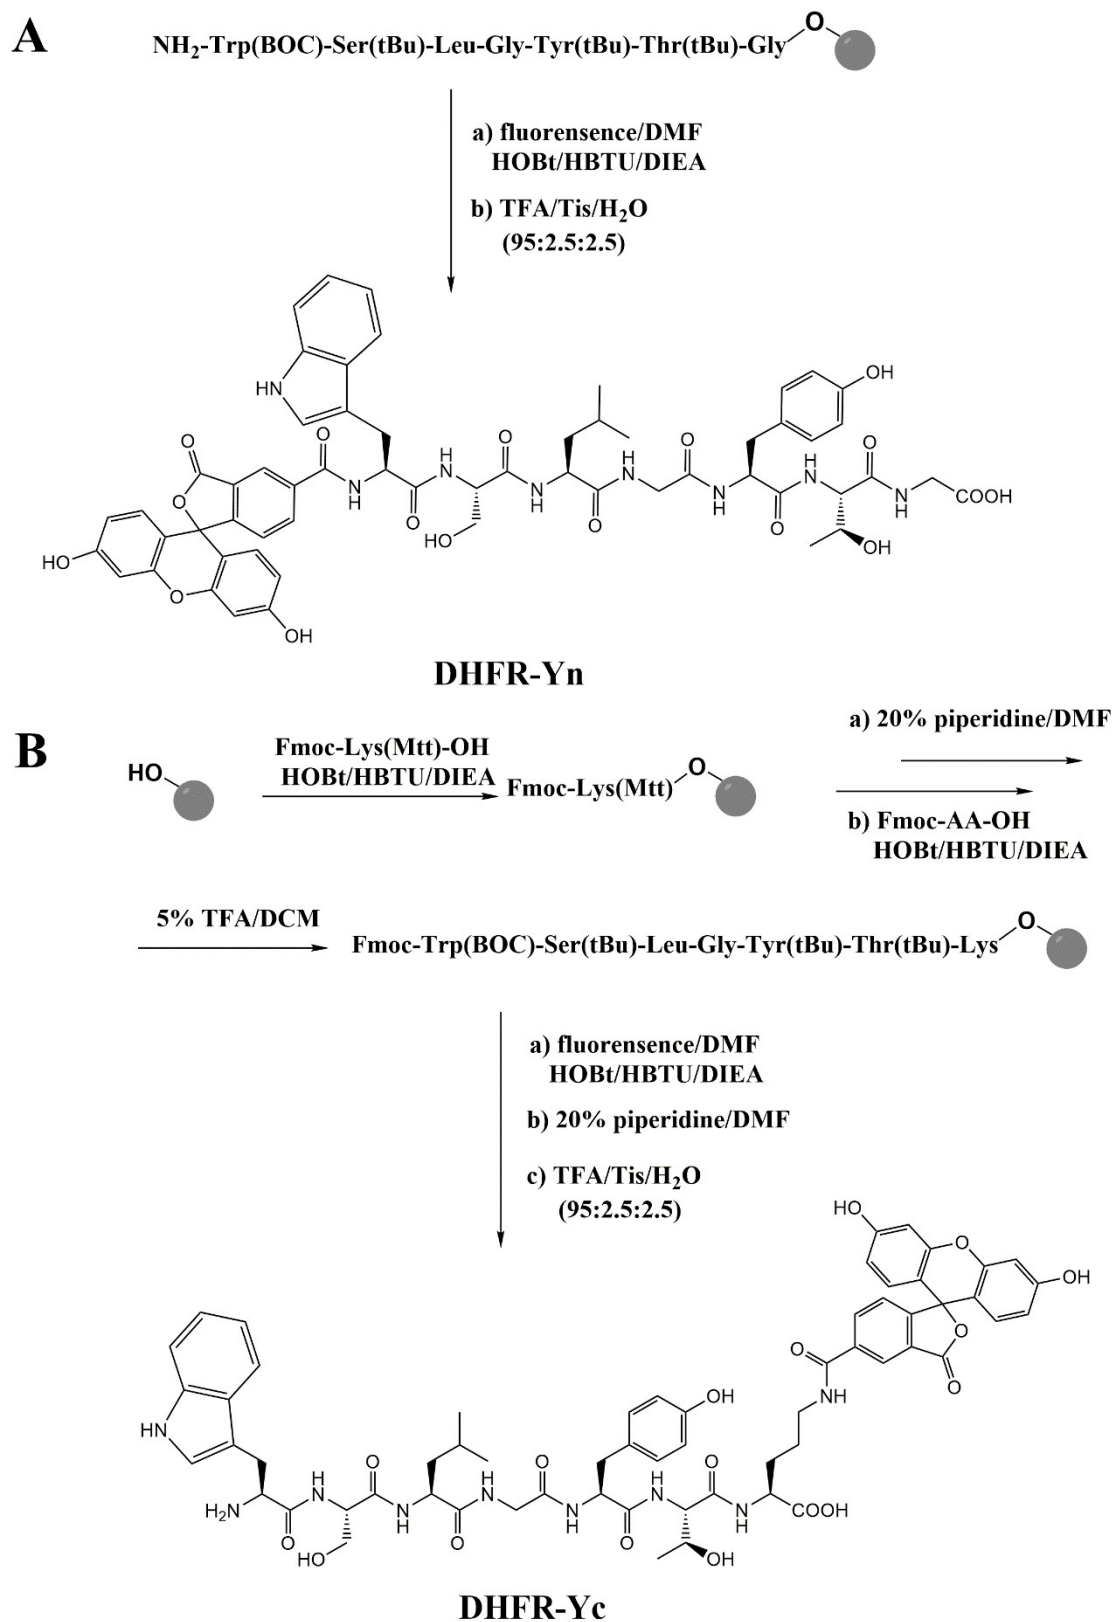

**Figure S2.** Derivatization strategies.

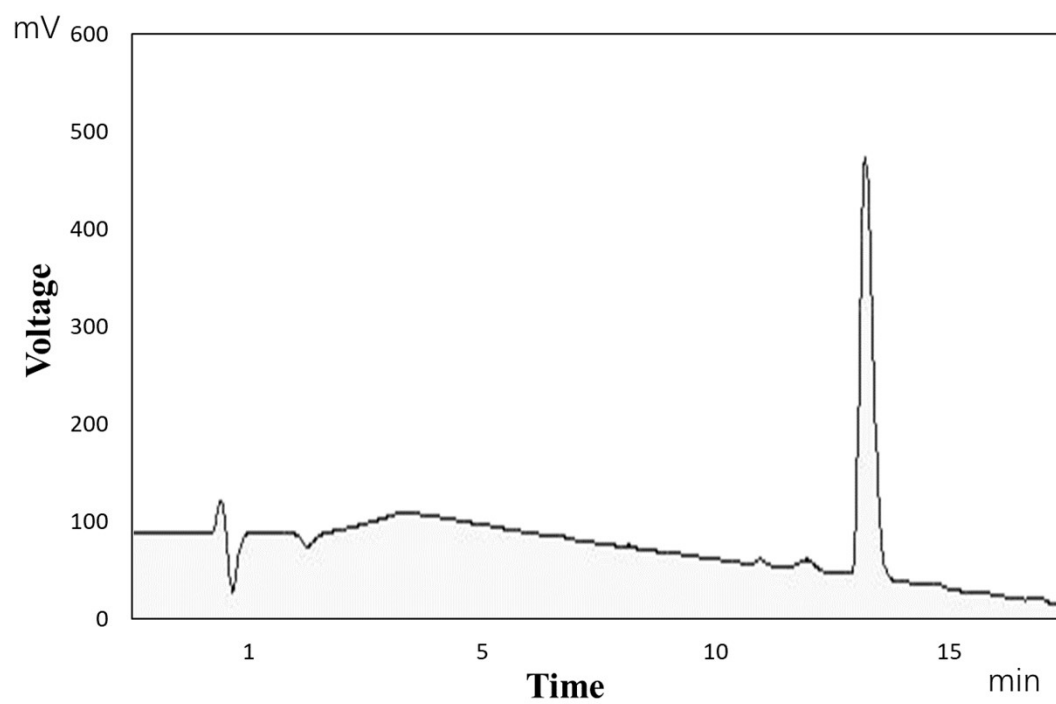

**Figure S3:** HPLC spectrum of DHFR-Y1.

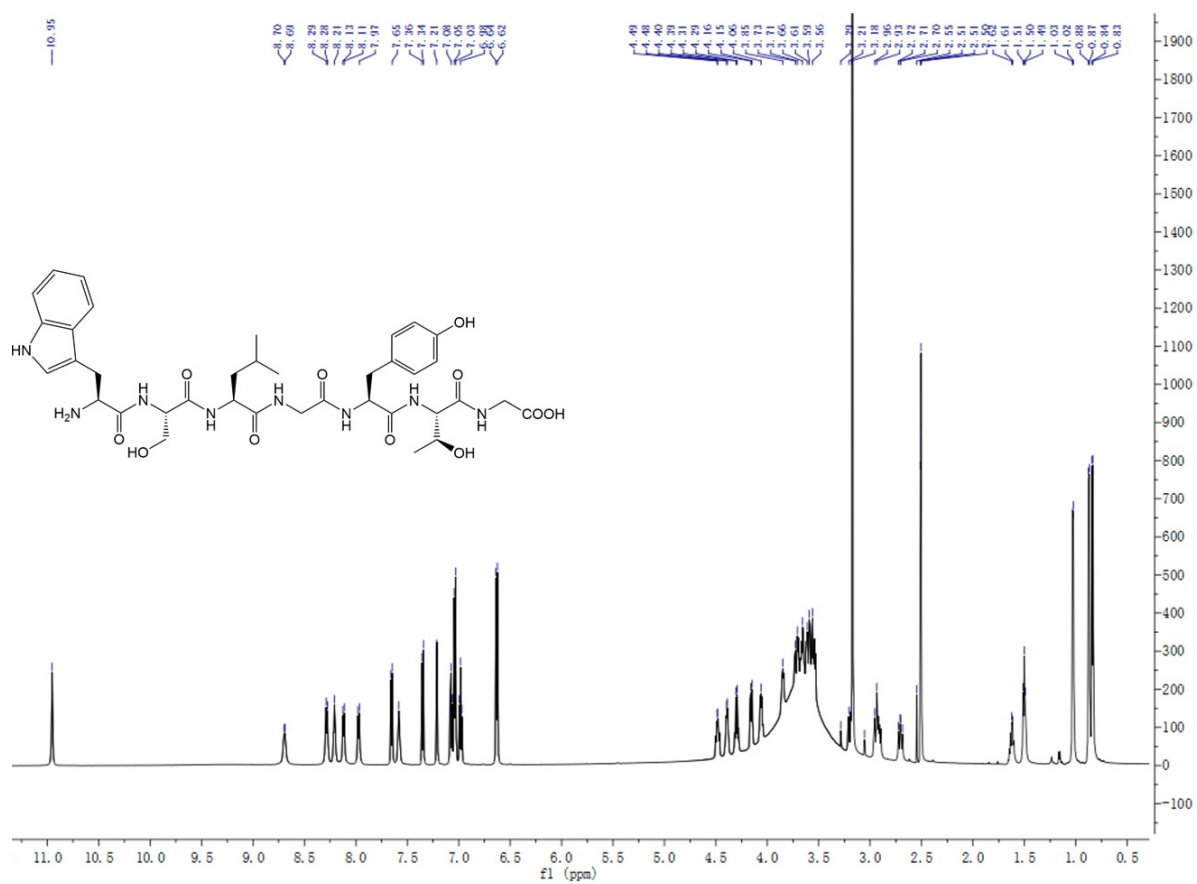

**Figure S4:** 1D  $^1\text{H}$  NMR spectra of DHFR-Y1 in DMSO- $d_6$ .

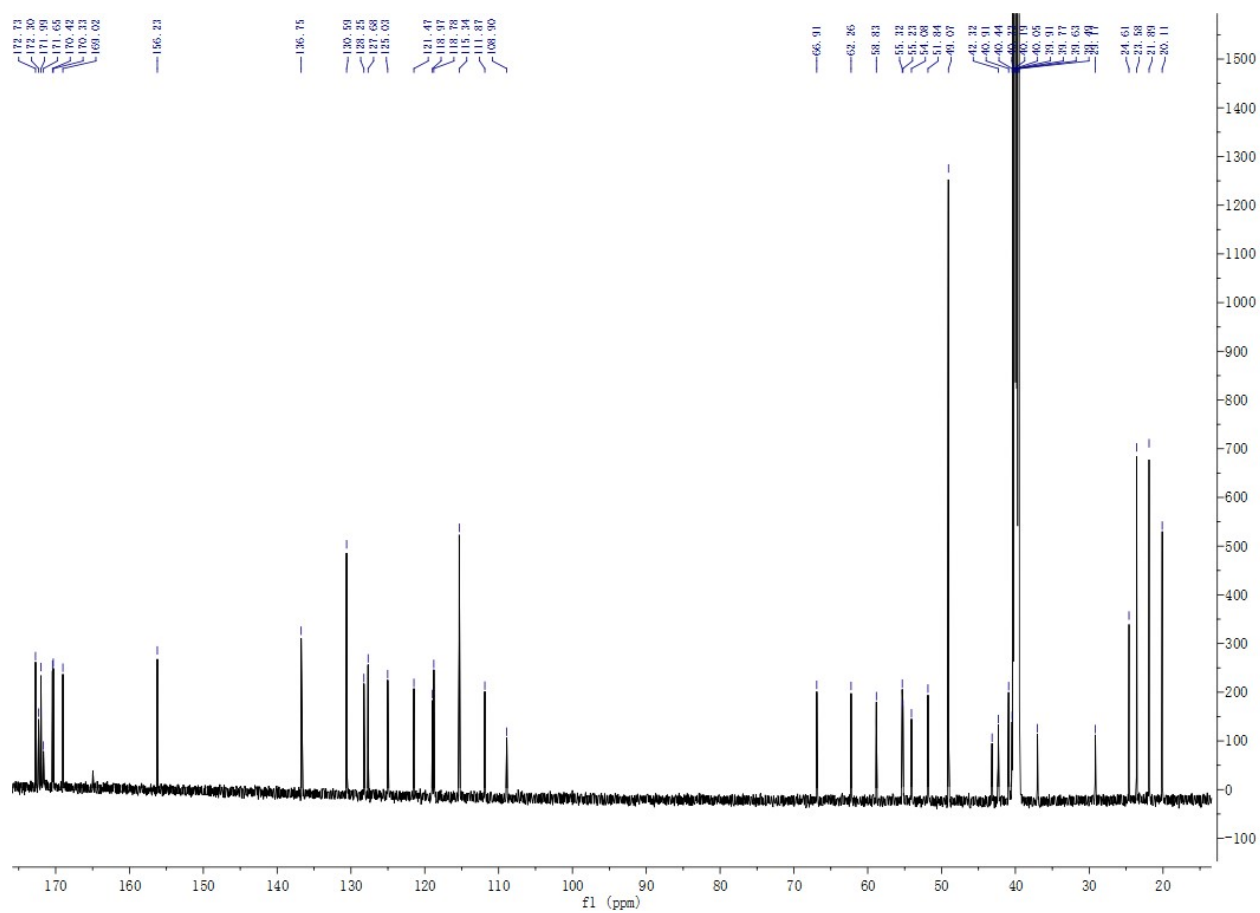

Figure S5: 1D  $^{13}\text{C}$  NMR spectrum of DHFR-Y1 in DMSO- $\text{d}_6$ .

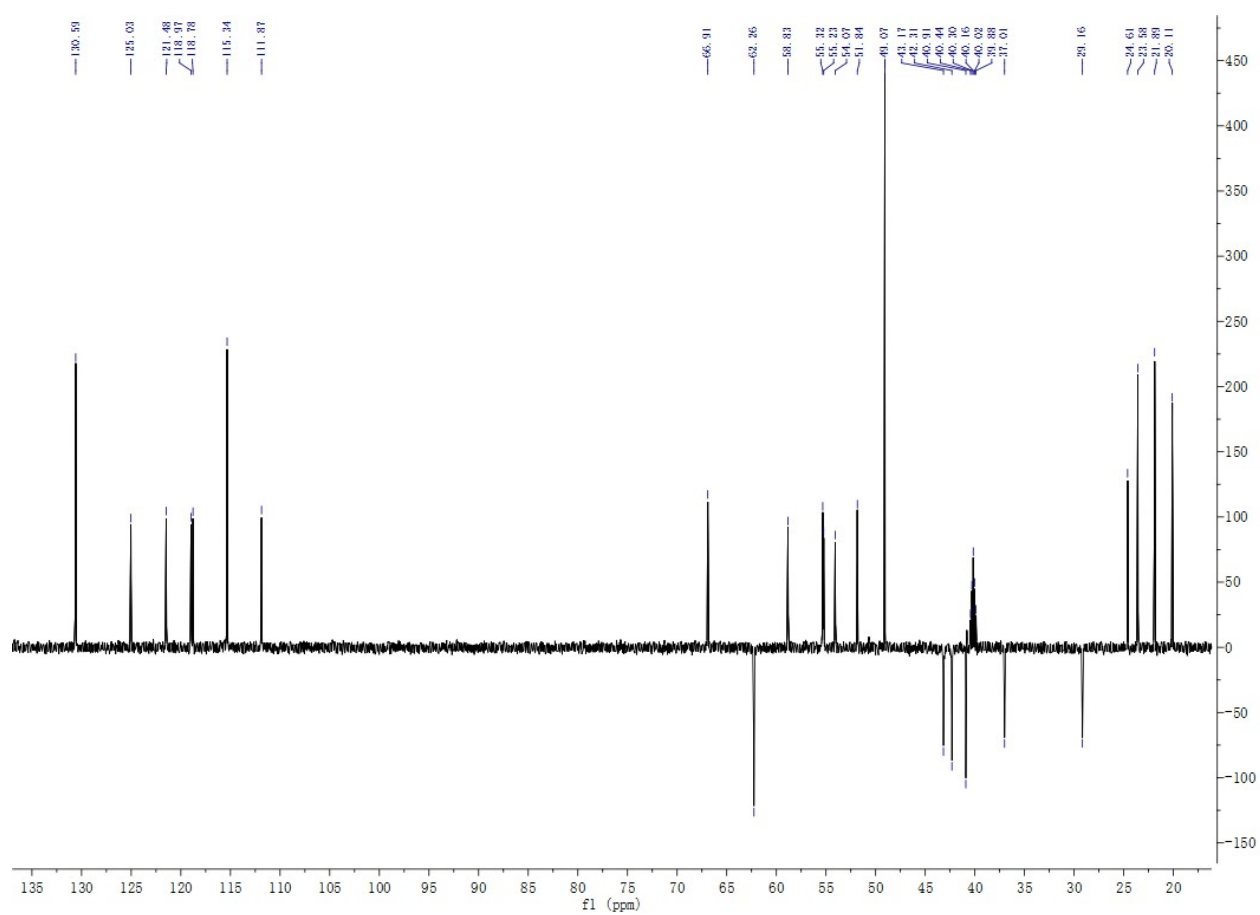

Figure S6: 1D DEPT 135 spectrum of DHFR-Y1 in DMSO-d<sub>6</sub>.



T: FTMS + p ESI Full ms [150.0000-800.0000]

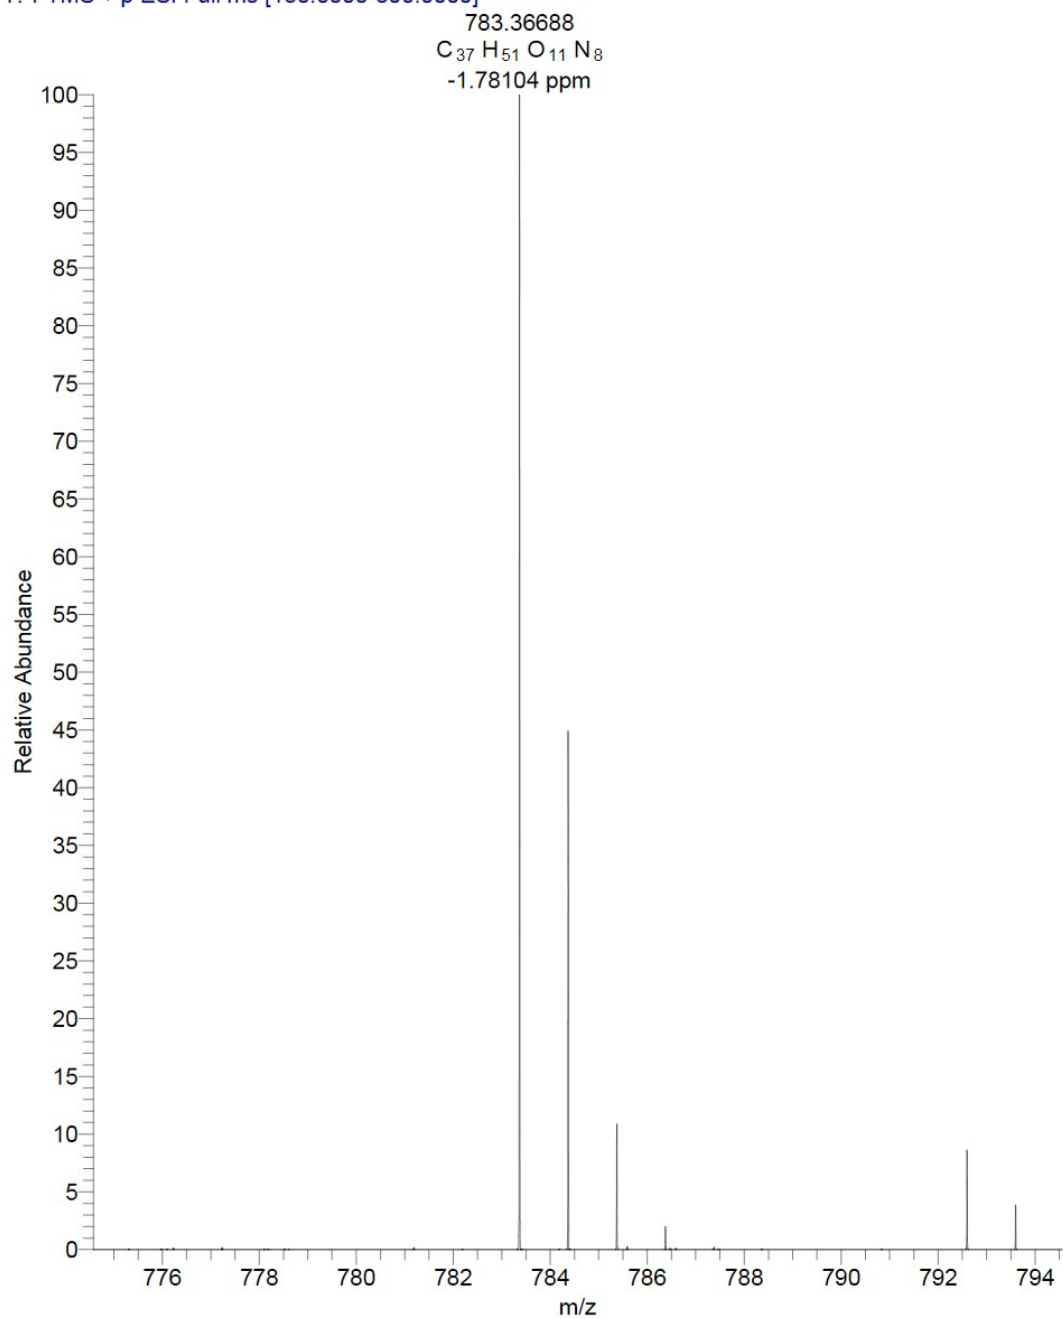

**Figure S7:** Mass spectrum of DHFR-Y1.

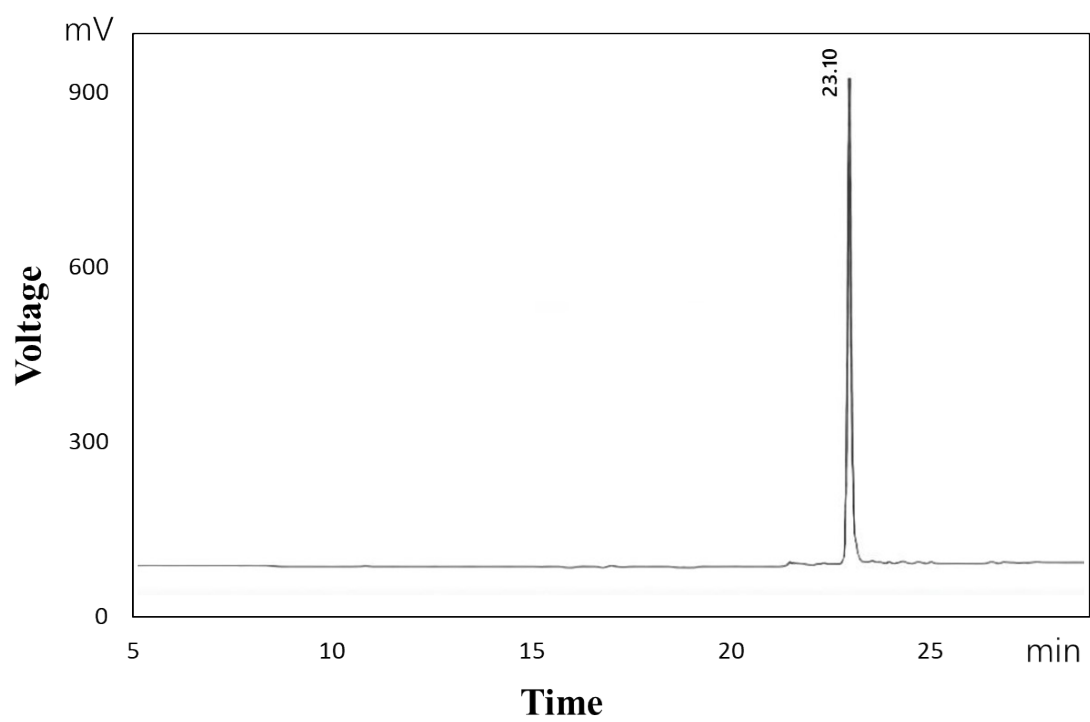

**Figure S8:** HPLC spectrum of DHFR-Yn.

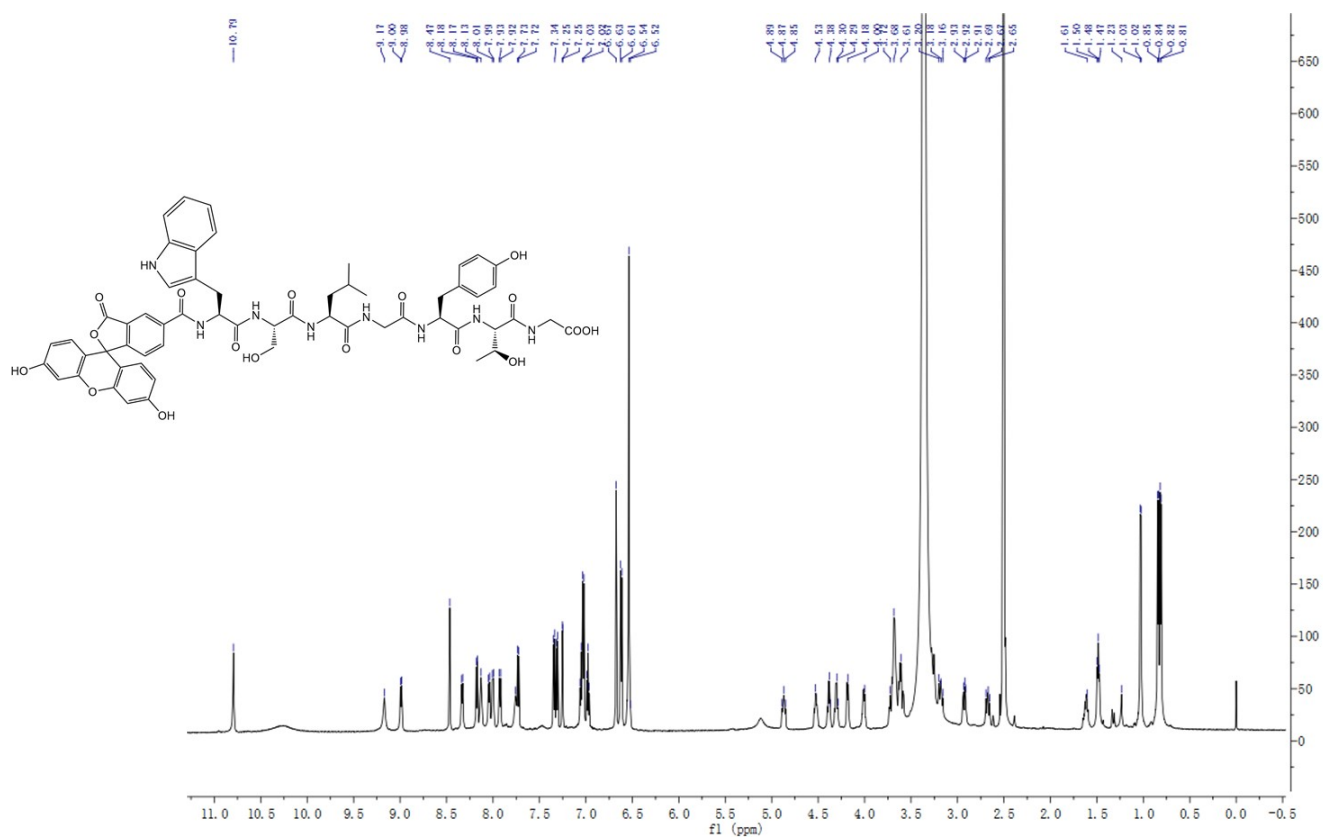

**Figure S9:** 1D  $^1\text{H}$  NMR spectrum of DHFR-Yn in DMSO- $d_6$

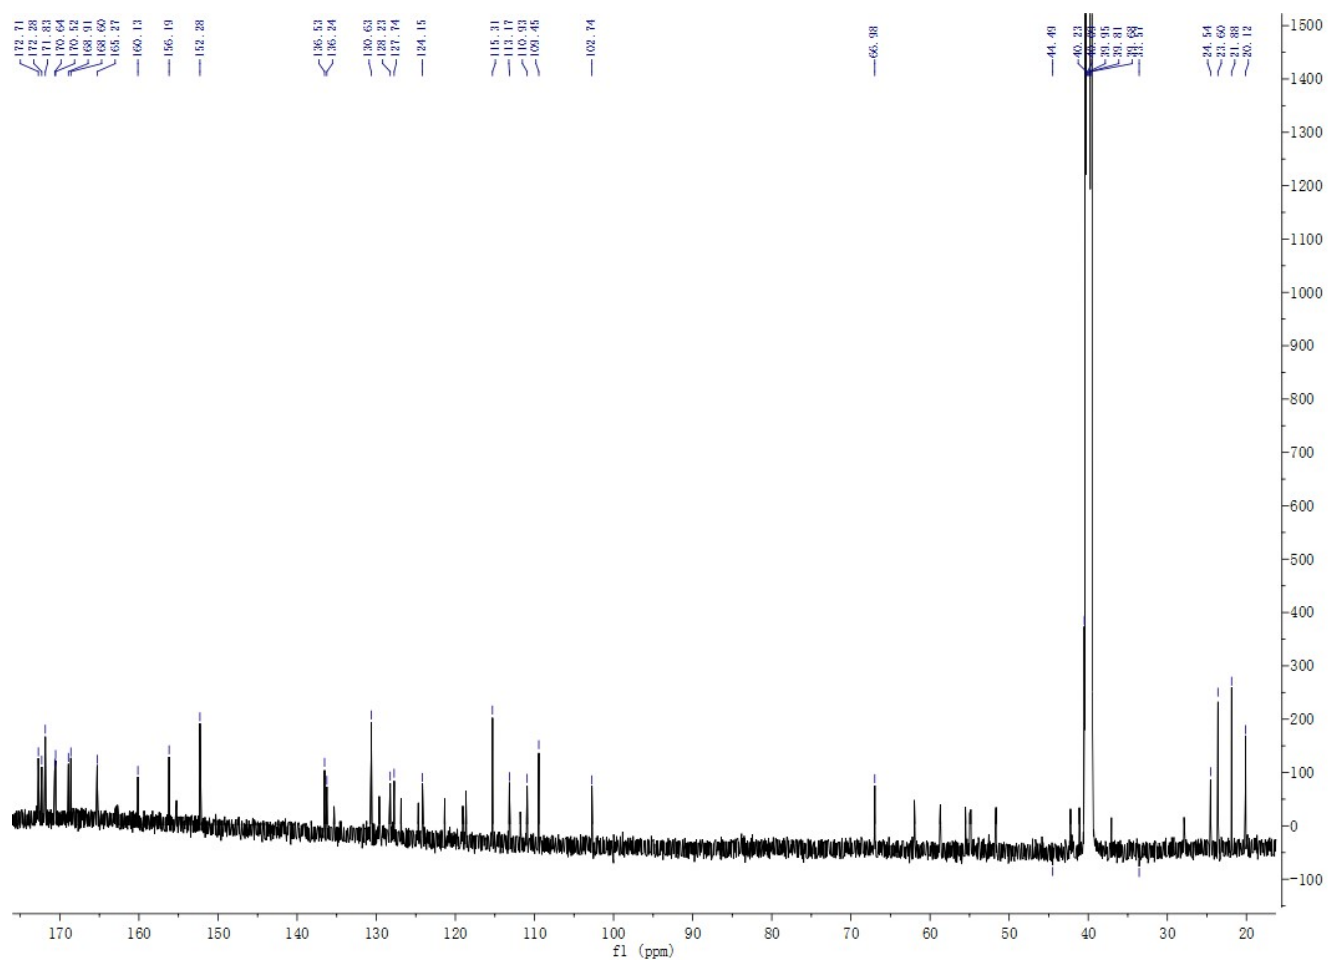

**Figure S10:** 1D  $^{13}\text{C}$  NMR spectrum of DHFR-Yn in DMSO- $\text{d}_6$

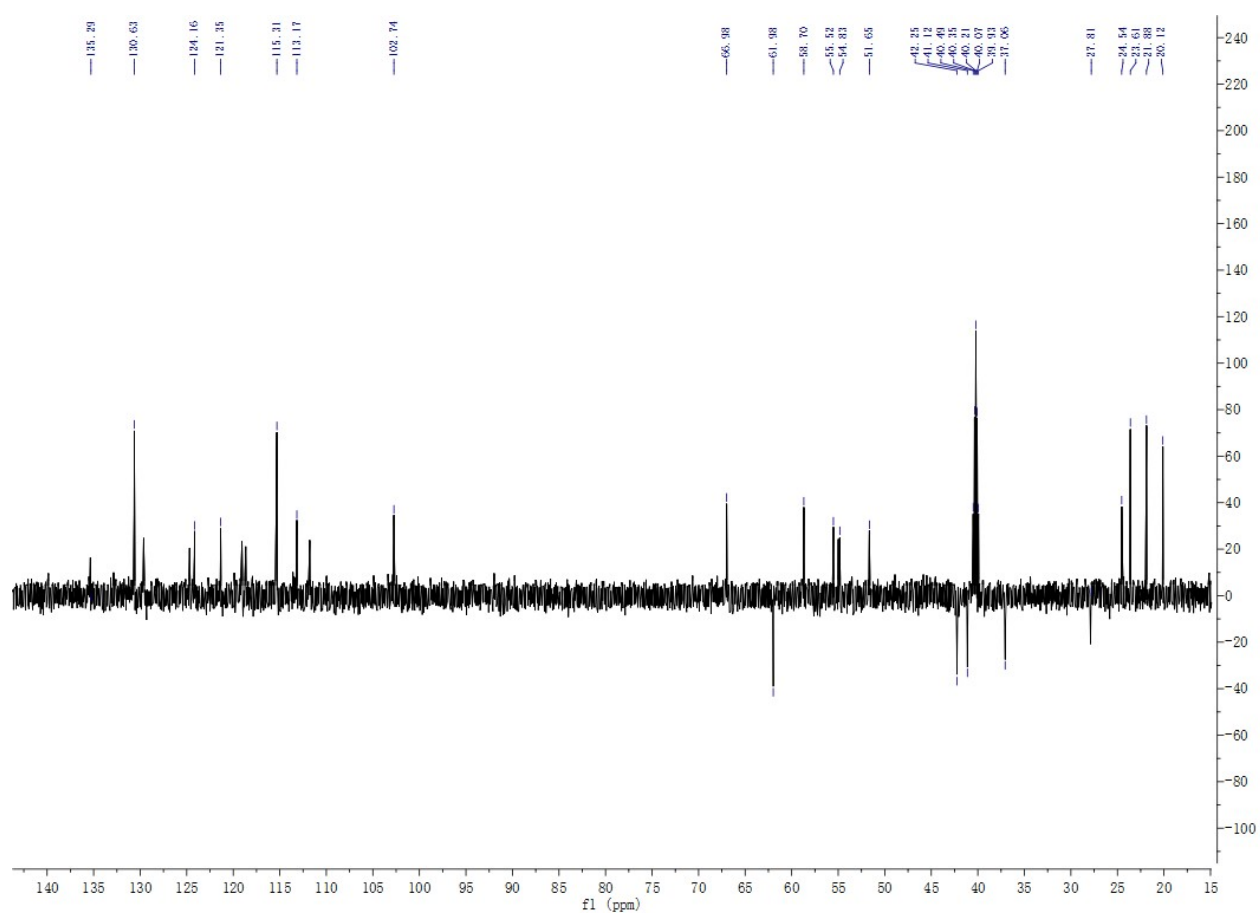

**Figure S11:** 1D DEPT 135 spectrum of DHFR-Yn in DMSO-d<sub>6</sub>.

T: FTMS + p ESI Full ms [900.0000-1400.0000]

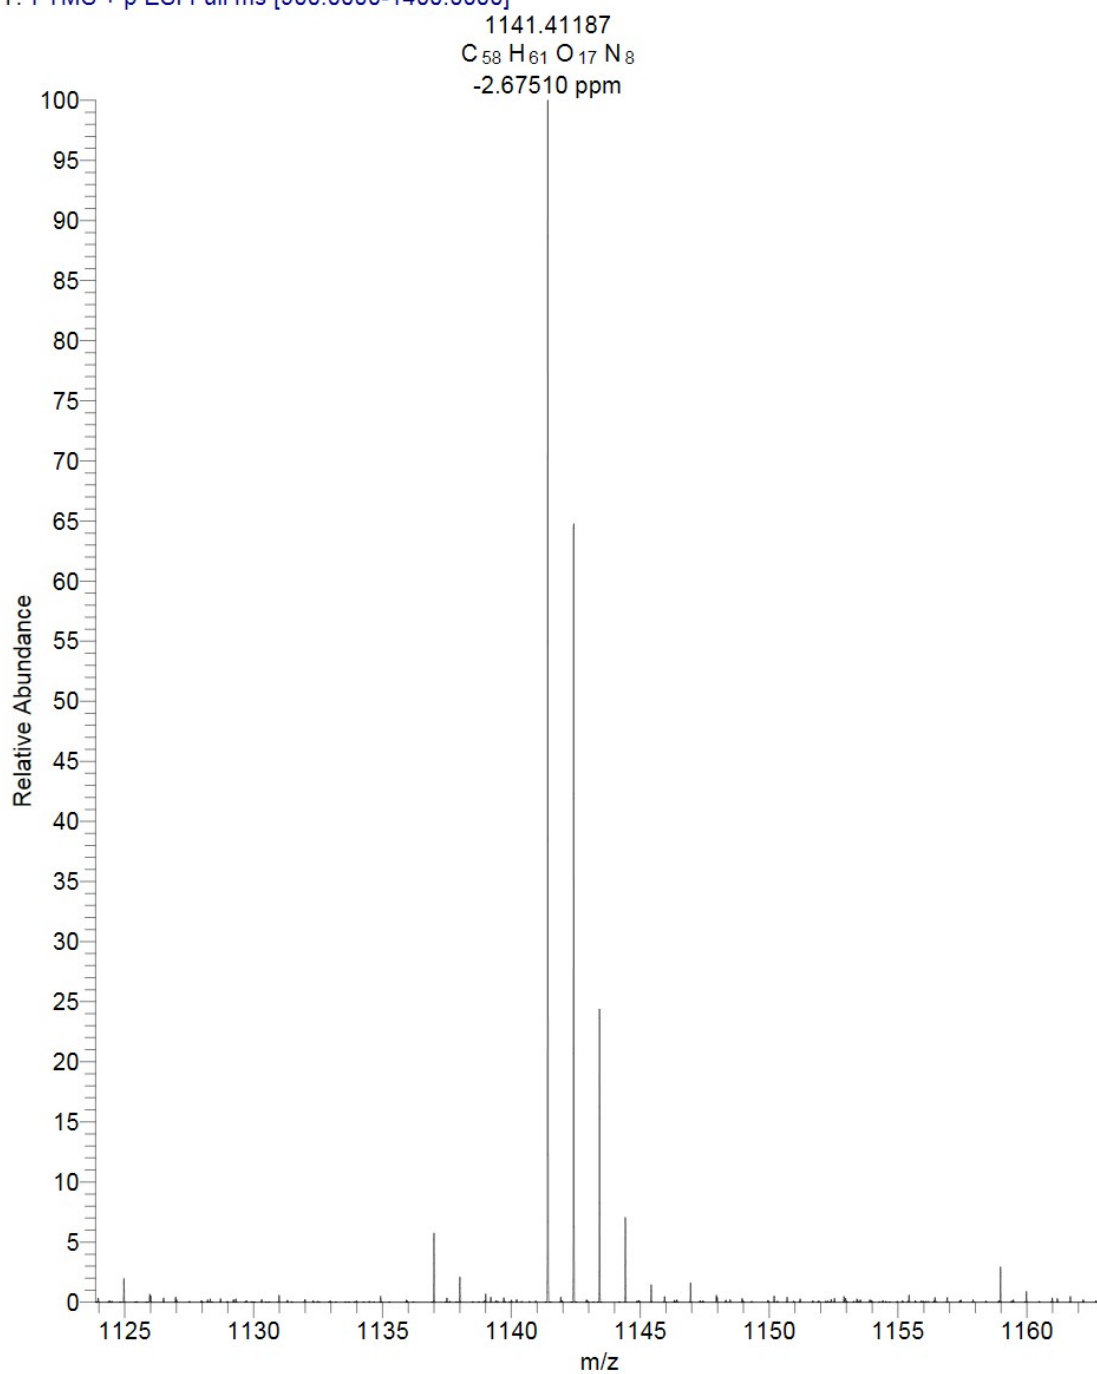

**Figure S12:** Mass spectrum of DHFR-Yn.

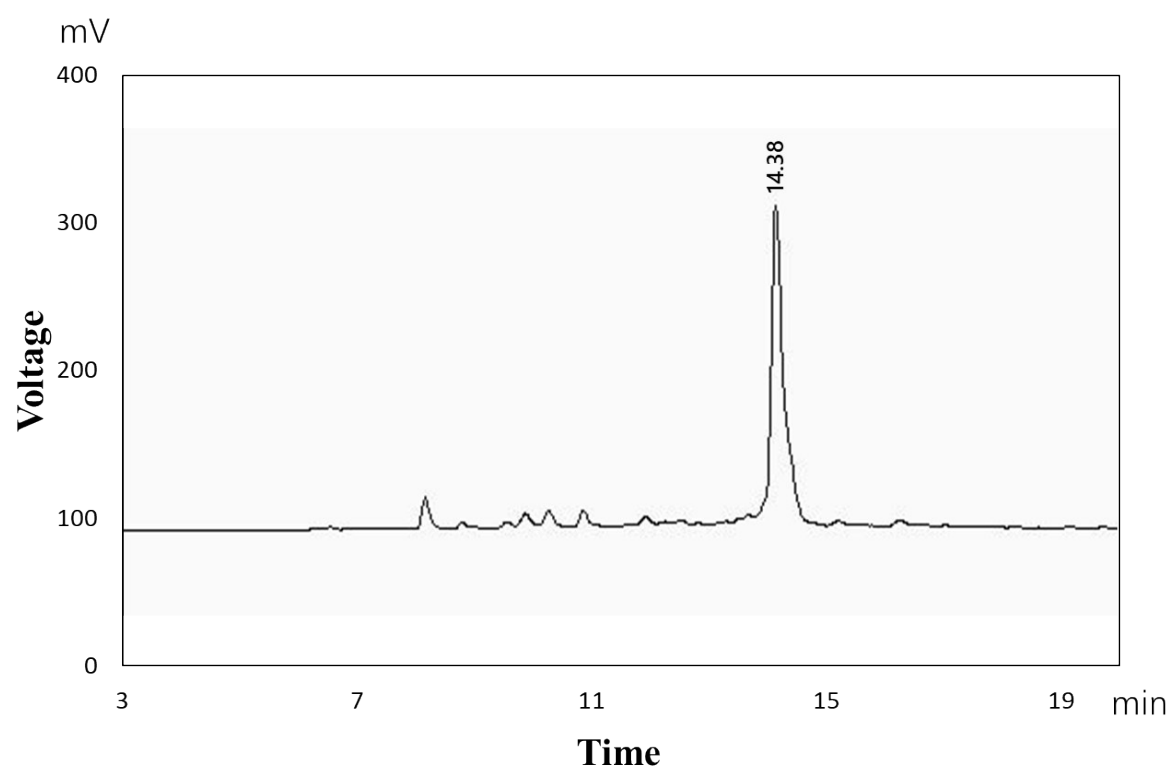

**Figure S13:** HPLC spectrum of DHFR-Yc.

T: FTMS + p ESI Full ms [1000.0000-1400.0000]

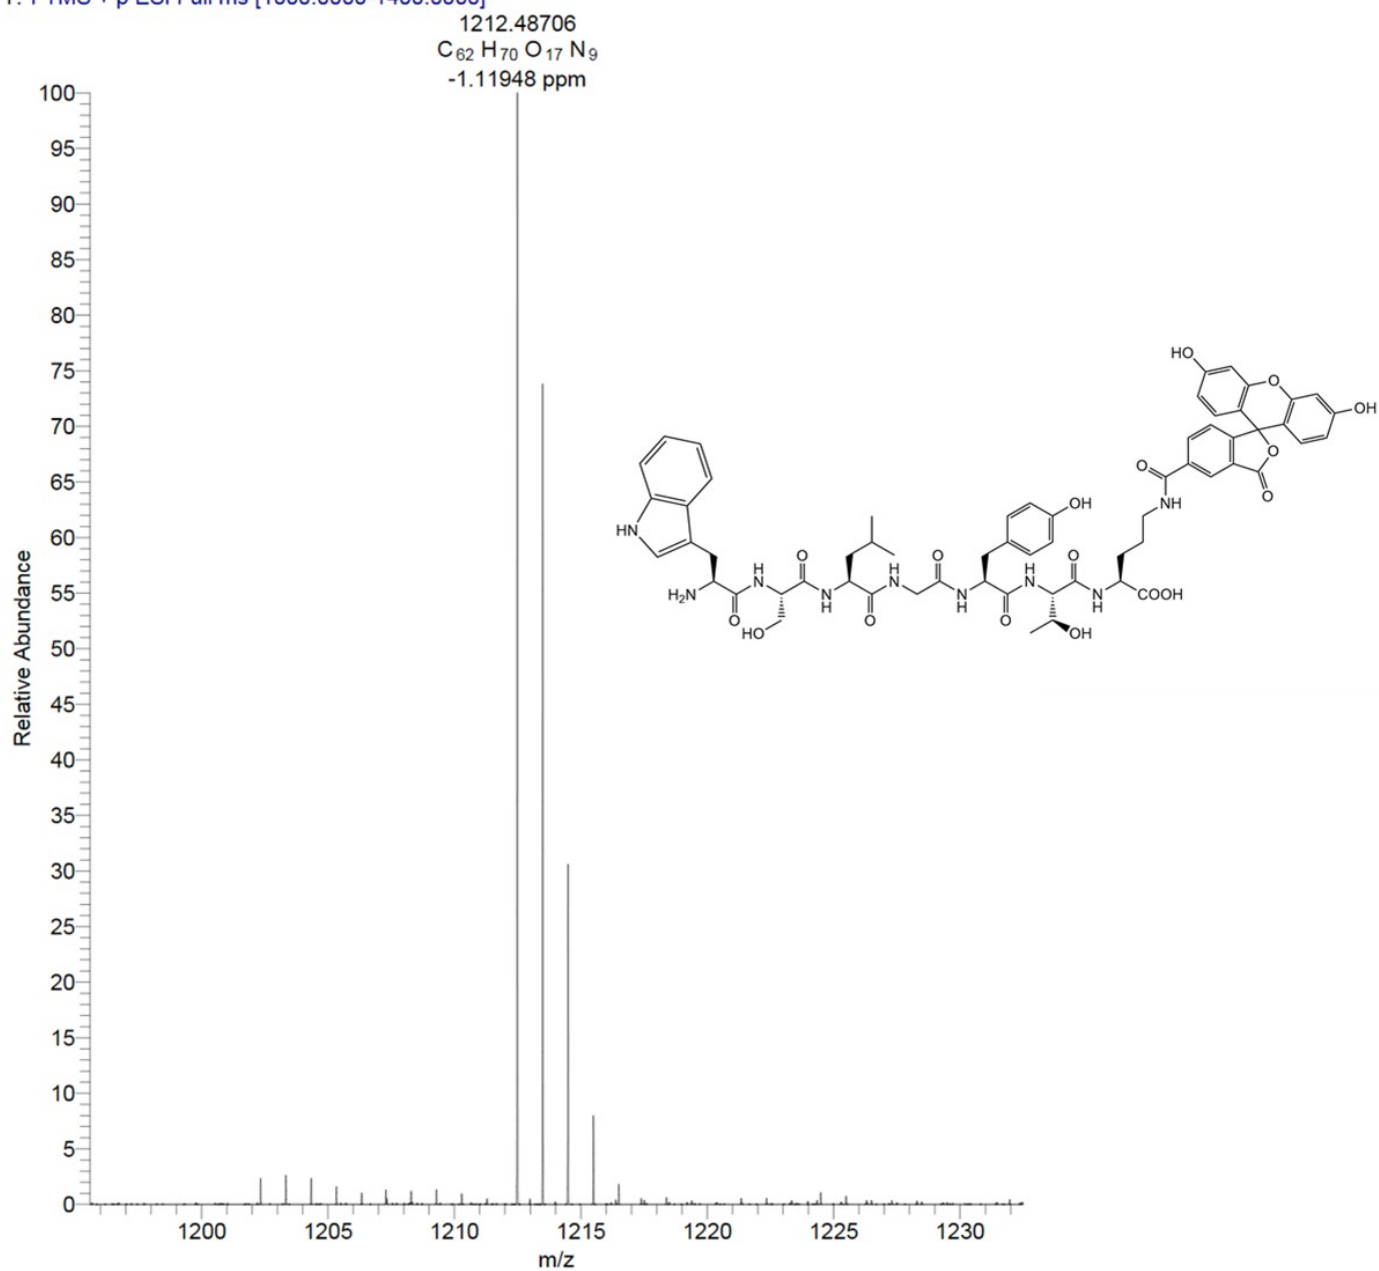

**Figure S14:** Mass spectrum of DHFR-Yc.



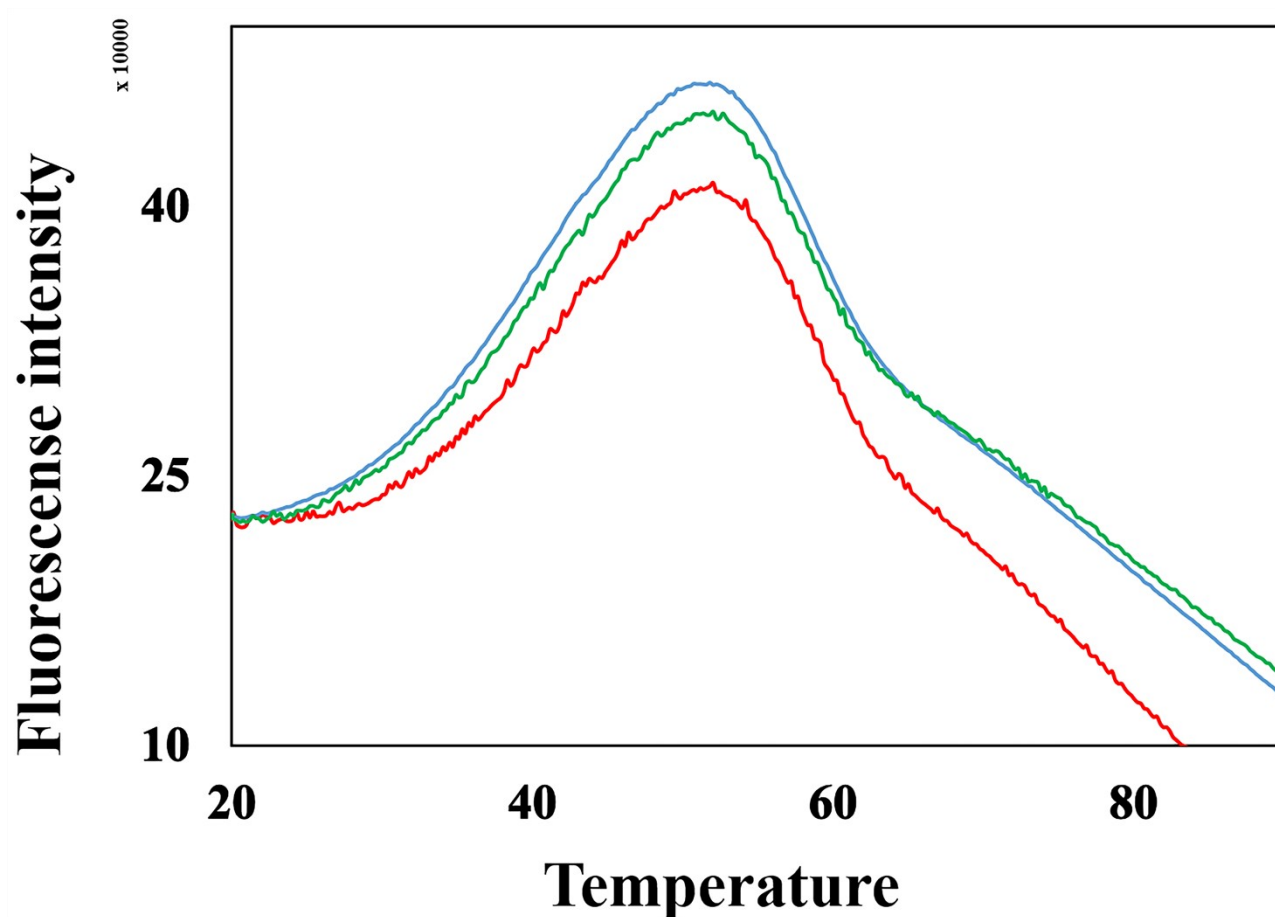

**Figure S15:** Superposition of the DSF assay showing the curve for the peptide DHFR-Y1 (red), the apo enzyme (blue) and the unrelated peptide (green, control).
